# Supplementary material for: Temporal and spatial distribution of histone acetylation in mouse molar development
Source: PeerJ. 2025 Mar 31;13:e19215. doi: 10.7717/peerj.19215 (PMC11967410; doi:10.7717/peerj.19215)
Supplement: Supplemental Information 5 — Each data point indicates the determine the average immunofluorescence pixel intensity of epithelium and mesenchyme/dental papilla for each antibody at different time point. [file peerj-13-19215-s005.xlsx]

## Sheet: H3ac
	E13.5	epi	mes	normalization(epi/mes)	normalization(mes/mes)
	sample1	245.904	225.301	1.09145	1
	sample2	341.326	330.658	1.03226	1
	sample3	297.432	258.891	1.14887	1
	E14.5	epi	dp	normalization(epi/dp)	normalization(mes/dp)
	sample1	516.456	663.618	0.778243	1
	sample2	467.66	516.408	0.905602	1
	sample3	588.262	736.665	0.798548	1
	E16.5	epi	IEE	dp	normalization(epi/dp)	normalization(iee/dp)	normalization(mes/dp)
	sample1	1021.44	1308.88	1068.48	0.955978	1.22499	1
	sample2	1320.86	1304.59	1243.81	1.06195	1.04886	1
	sample3	597.265	671.515	536.196	1.11389	1.25237	1
	E18.5	epi	IEE	dp	normalization(epi/dp)	normalization(iee/dp)	normalization(mes/dp)
	sample1	350.44	546.726	267.832	1.30843	2.0413	1
	sample2	313.38	468.145	237.455	1.31974	1.97151	1
	sample3	391.846	694.818	344.764	1.13656	2.01534	1
	E18.5	epi	IEE	dp	normalization(epi/dp)	normalization(iee/dp)	normalization(mes/dp)
	sample1	250.234	694.469	250.83	0.997624	2.76868	1
	sample2	406.844	641.542	360.046	1.12998	1.78183	1
	sample3	382.98	633.911	311.512	1.22942	2.03495	1

## Sheet: H4ac
	E13.5	epi	mes	normalization(epi/mes)	normalization(mes/mes)
	sample1	500.752	485.53	1.03135	1
	sample2	520.514	464.299	1.12107	1
	sample3	400.704	391.119	1.02451	1
	E14.5	epi	dp	normalization(epi/dp)	normalization(mes/dp)
	sample1	746.315	848.632	0.879433	1
	sample2	521.174	542.609	0.960496	1
	sample3	469.181	490.638	0.956267	1
	E16.5	epi	IEE	dp	normalization(epi/dp)	normalization(iee/dp)	normalization(mes/dp)
	sample1	870.792	822.627	679.221	1.28205	1.21113	1
	sample2	912.772	799.275	921.343	0.990697	0.867511	1
	sample3	797.084	765.598	773.35	1.03069	0.989976	1
	E18.5	epi	IEE	dp	normalization(epi/dp)	normalization(iee/dp)	normalization(mes/dp)
	sample1	624.153	979.255	410.988	1.51866	2.38269	1
	sample2	424.94	861.143	487.708	0.8713	1.76569	1
	sample3	359.412	721.763	352.25	1.02033	2.04901	1
	E18.5	epi	IEE	dp	normalization(epi/dp)	normalization(iee/dp)	normalization(mes/dp)
	sample1	401.894	900.885	319.277	1.25876	2.82164	1
	sample2	362.897	682.554	314.333	1.1545	2.17144	1
	sample3	402.943	713.019	412.754	0.97623	1.72747	1

## Sheet: H3K9ac
	E13.5	epi	mes	normalization(epi/mes)	normalization(mes/mes)
	sample1	296.417	304.814	0.972452	1
	sample2	318.103	333.543	0.953709	1
	sample3	313.086	310.26	1.00911	1
	E14.5	epi	dp	normalization(epi/dp)	normalization(mes/dp)
	sample1	543.743	592.956	0.917004	1
	sample2	521.826	553.076	0.943498	1
	sample3	385.648	376.575	1.02409	1
	E16.5	epi	IEE	dp	normalization(epi/dp)	normalization(iee/dp)	normalization(mes/dp)
	sample1	453.079	380.859	467.477	0.969201	0.814712	1
	sample2	613.795	621.219	623.217	0.984882	0.996794	1
	sample3	705.572	623.796	674.646	1.04584	0.924627	1
	E18.5	epi	IEE	dp	normalization(epi/dp)	normalization(iee/dp)	normalization(mes/dp)
	sample1	337.381	521.675	246.743	1.36734	2.11424	1
	sample2	507.142	614.605	315.618	1.60682	1.94731	1
	sample3	619.906	801.999	393.604	1.57495	2.03758	1
	E18.5	epi	IEE	dp	normalization(epi/dp)	normalization(iee/dp)	normalization(mes/dp)
	sample1	367.697	832.306	435.419	0.844467	1.91151	1
	sample2	396.7	784.504	382.283	1.03771	2.05216	1
	sample3	388.047	798.33	428.073	0.906497	1.86494	1

## Sheet: H3K27ac
	E13.5	epi	mes	normalization(epi/mes)	normalization(mes/mes)
	sample1	341.326	330.658	1.03226	1
	sample2	297.432	262.891	1.13139	1
	sample3	406.032	398.354	1.01927	1
	E14.5	epi	dp	normalization(epi/dp)	normalization(mes/dp)
	sample1	375.797	420.386	0.893933	1
	sample2	415.205	511.352	0.811975	1
	sample3	358.537	396.063	0.905252	1
	E16.5	epi	IEE	dp	normalization(epi/dp)	normalization(iee/dp)	normalization(mes/dp)
	sample1	527.223	760.048	575.141	0.916685	1.3215	1
	sample2	549.737	729.72	663.638	0.828369	1.09958	1
	sample3	715.161	972.437	820.283	0.871847	1.18549	1
	E18.5	epi	IEE	dp	normalization(epi/dp)	normalization(iee/dp)	normalization(mes/dp)
	sample1	350.44	546.726	267.832	1.30843	2.0413	1
	sample2	673.582	1066.81	497.41	1.35418	2.14472	1
	sample3	597.62	906.019	475.79	1.25606	1.90424	1
	E18.5	epi	IEE	dp	normalization(epi/dp)	normalization(iee/dp)	normalization(mes/dp)
	sample1	464.996	992.924	501.202	0.927762	1.98109	1
	sample2	335.048	475.168	289.138	1.15878	1.6434	1
	sample3	333.114	503.453	246	1.35412	2.04656	1

## Sheet: H4K5ac
	E13.5	epi	mes	normalization(epi/mes)	normalization(mes/mes)
	sample1	374.364	364.174	1.02798	1
	sample2	312.852	311.358	1.0048	1
	sample3	210.785	227.856	0.92508	1
	E14.5	epi	dp	normalization(epi/dp)	normalization(mes/dp)
	sample1	600.19	749.986	0.800268	1
	sample2	639.749	712.284	0.898166	1
	sample3	677.216	727.305	0.931131	1
	E16.5	epi	IEE	dp	normalization(epi/dp)	normalization(iee/dp)	normalization(mes/dp)
	sample1	603.438	680.224	563.66	1.07057	1.2068	1
	sample2	598.862	583.454	623.32	0.960762	0.936042	1
	sample3	592.107	789.8	600.175	0.986557	1.31595	1
	E18.5	epi	IEE	dp	normalization(epi/dp)	normalization(iee/dp)	normalization(mes/dp)
	sample1	664.782	1112.39	575.453	1.15523	1.93307	1
	sample2	508.275	891.245	479.723	1.05952	1.85783	1
	sample3	721.089	1240.38	595.746	1.2104	2.08206	1
	E18.5	epi	IEE	dp	normalization(epi/dp)	normalization(iee/dp)	normalization(mes/dp)
	sample1	539.528	928.682	385.73	1.39872	2.4076	1
	sample2	531.331	743.079	477.504	1.11273	1.55617	1
	sample3	464.925	718.532	360.013	1.29141	1.99585	1

## Sheet: H4K16ac
	E13.5	epi	mes	normalization(epi/mes)	normalization(mes/mes)
	sample1	391.317	330.205	1.18507	1
	sample2	511.326	443.539	1.15283	1
	sample3	389.956	385.366	1.01191	1
	E14.5	epi	dp	normalization(epi/dp)	normalization(mes/dp)
	sample1	622.778	605.236	1.02898	1
	sample2	454.162	462.492	0.981989	1
	sample3	574.681	604.652	0.950433	1
	E16.5	epi	IEE	dp	normalization(epi/dp)	normalization(iee/dp)	normalization(mes/dp)
	sample1	804.662	890.572	782.434	1.02841	1.13821	1
	sample2	624.761	753.001	615.811	1.01453	1.22278	1
	sample3	710.268	871.295	716.207	0.991708	1.21654	1
	E18.5	epi	IEE	dp	normalization(epi/dp)	normalization(iee/dp)	normalization(mes/dp)
	sample1	645.197	938.055	612.263	1.05379	1.53211	1
	sample2	604.661	964.768	556.346	1.08684	1.73412	1
	sample3	688.862	1043.15	622.89	1.10591	1.67469	1
	E18.5	epi	IEE	dp	normalization(epi/dp)	normalization(iee/dp)	normalization(mes/dp)
	sample1	462.727	648.784	377.406	1.22607	1.71906	1
	sample2	557.661	833.871	512.802	1.08748	1.62611	1
	sample3	591.873	945.028	569.412	1.03945	1.65966	1

## Sheet: HDAC1
	E12.5	epi	mes	normalization(epi/mes)	normalization(mes/mes)
	sample1	15.174	10.551	1.43816	1
	sample2	8.59	5.84	1.47089	1
	sample3	10.163	6.337	1.60376	1
	E14.5	epi	mes	normalization(epi/mes)	normalization(mes/mes)
	sample1	20.243	32.794	0.617278	1
	sample2	23	34.448	0.667673	1
	sample3	18.794	29.318	0.64104	1
	E16.5	epi	mes	normalization(epi/mes)	normalization(mes/mes)
	sample1	7.036	7.864	0.89471	1
	sample2	6.221	6.416	0.969607	1
	sample3	11.306	11.016	1.02633	1
	P0	epi	mes	normalization(epi/mes)	normalization(mes/mes)
	sample1	22.757	30.97	0.734808	1
	sample2	5.468	7.207	0.758707	1
	sample3	26.723	25.619	1.04309	1

## Sheet: HDAC2
	E12.5	epi	mes	normalization(epi/mes)	normalization(mes/mes)
	sample1	16.656	9.585	1.73772	1
	sample2	12.243	11.581	1.05716	1
	sample3	11.252	10.165	1.10694	1
	E14.5	epi	mes	normalization(epi/mes)	normalization(mes/mes)
	sample1	22.307	22.965	0.971348	1
	sample2	25.045	24.824	1.0089	1
	sample3	8.904	12.263	0.726087	1
	E16.5	epi	mes	normalization(epi/mes)	normalization(mes/mes)
	sample1	39.33	32.933	1.19424	1
	sample2	35.056	25.511	1.37415	1
	sample3	32.743	29.412	1.11325	1
	P0	epi	mes	normalization(epi/mes)	normalization(mes/mes)
	sample1	21.042	10.474	2.00897	1
	sample2	38.457	21.952	1.75187	1
	sample3	21.503	7.359	2.922	1

## Sheet: crebbp
	E12.5	epi	mes	normalization(epi/mes)	normalization(mes/mes)
	sample1	30.494	28.913	1.05468	1
	sample2	29.133	26.937	1.08152	1
	sample3	33.516	30.164	1.11113	1
	E14.5	epi	mes	normalization(epi/mes)	normalization(mes/mes)
	sample1	15.011	19.883	0.754967	1
	sample2	16.642	25.473	0.653319	1
	sample3	18.095	19.358	0.934756	1
	E16.5	epi	mes	normalization(epi/mes)	normalization(mes/mes)
	sample1	24.172	25.054	0.964796	1
	sample2	22.042	22.594	0.975569	1
	sample3	25.094	28.303	0.88662	1
	P0	epi	mes	normalization(epi/mes)	normalization(mes/mes)
	sample1	37.271	42.429	0.878432	1
	sample2	39.127	59.497	0.65763	1
	sample3	32.166	51.837	0.620522	1

## Sheet: EP300
	E12.5	epi	mes	normalization(epi/mes)	normalization(mes/mes)
	sample1	5.754	8.882	0.647827	1
	sample2	9.533	12.577	0.757971	1
	sample3	6.357	11.362	0.559497	1
	E14.5	epi	mes	normalization(epi/mes)	normalization(mes/mes)
	sample1	17.883	24.102	0.741972	1
	sample2	26.591	38.958	0.682556	1
	sample3	20.315	25.476	0.797417	1
	E16.5	epi	mes	normalization(epi/mes)	normalization(mes/mes)
	sample1	47.787	34.595	1.38133	1
	sample2	19.501	18.904	1.03158	1
	sample3	28.466	22.449	1.26803	1
	P0	epi	mes	normalization(epi/mes)	normalization(mes/mes)
	sample1	28.153	17.409	1.61715	1
	sample2	36.521	28.034	1.30274	1
	sample3	24.371	20.566	1.18501	1
